# Supplementary material for: Distraction test of the posterior superior iliac spine (PSIS) in the diagnosis of sacroiliac joint arthropathy
Source: BMC Surg. 2013 Oct 31;13:52. doi: 10.1186/1471-2482-13-52 (PMC3827936; doi:10.1186/1471-2482-13-52)
Supplement: Additional file 1 — Pain log for the documentation of VAS after SIJ infiltration. [file 1471-2482-13-52-S1.pdf]

## Patientenkleber

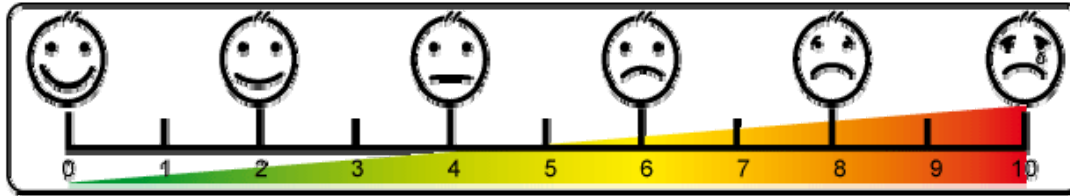

|                                                       |              |     |     |       |       |
|-------------------------------------------------------|--------------|-----|-----|-------|-------|
| <b>Patientenprotokoll</b><br><b>Schmerzintensität</b> | Infiltration | Typ | Ort | Seite | Datum |
|                                                       |              |     |     |       |       |

[illegible]
